# Supplementary material for: Microbial Imidazole Propionate Affects Responses to Metformin through p38γ-Dependent Inhibitory AMPK Phosphorylation
Source: PubMed Central journal article supplement — Cell Metab. 2020 Oct 6;32(4):643–653.e4. doi: 10.1016/j.cmet.2020.07.012 (PMC7546034; doi:10.1016/j.cmet.2020.07.012), 2020-10-06
Supplement: mmc1.pdf [file mmc1.pdf]

**Cell Metabolism, Volume 32**

**Supplemental Information**

**Microbial Imidazole Propionate Affects  
Responses to Metformin through p38 $\gamma$ -Dependent  
Inhibitory AMPK Phosphorylation**

**Ara Koh, Louise Mannerås-Holm, Na-Oh Yunn, Peter M. Nilsson, Sung Ho Ryu, Antonio Molinaro, Rosie Perkins, J. Gustav Smith, and Fredrik Bäckhed**

**A** Inverse relationship between AMPK T172 and S485/S491 phosphorylation

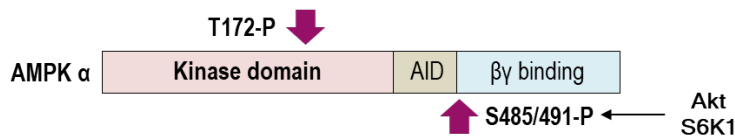

**B** 3-day treatment of imidazole propionate (Koh et al., 2018)

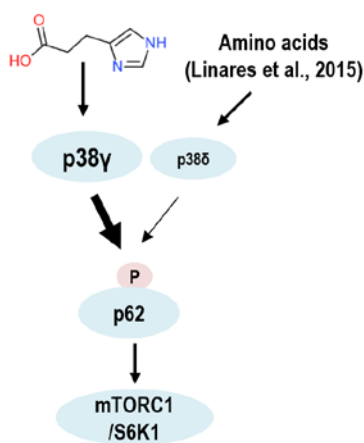

**C** Metformin and One injection of imidazole propionate (In this study)

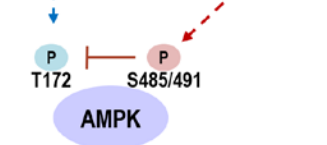

**D** One injection of imidazole propionate (In this study)

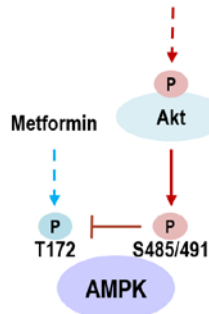

**E** Imidazole propionate

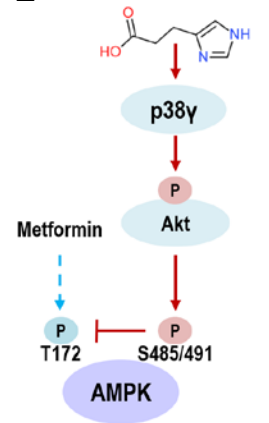

**Figure S1. Schematic depiction of signalling pathways related to this study, Related to Figure 2 to 4**

(A) Previously reported relationship between AMPK T172 and S485 phosphorylation.

(B) Previously reported signaling pathways activated after 3-day treatment with imidazole propionate or by amino acids.

(C-E) Signaling pathways investigated in this study.

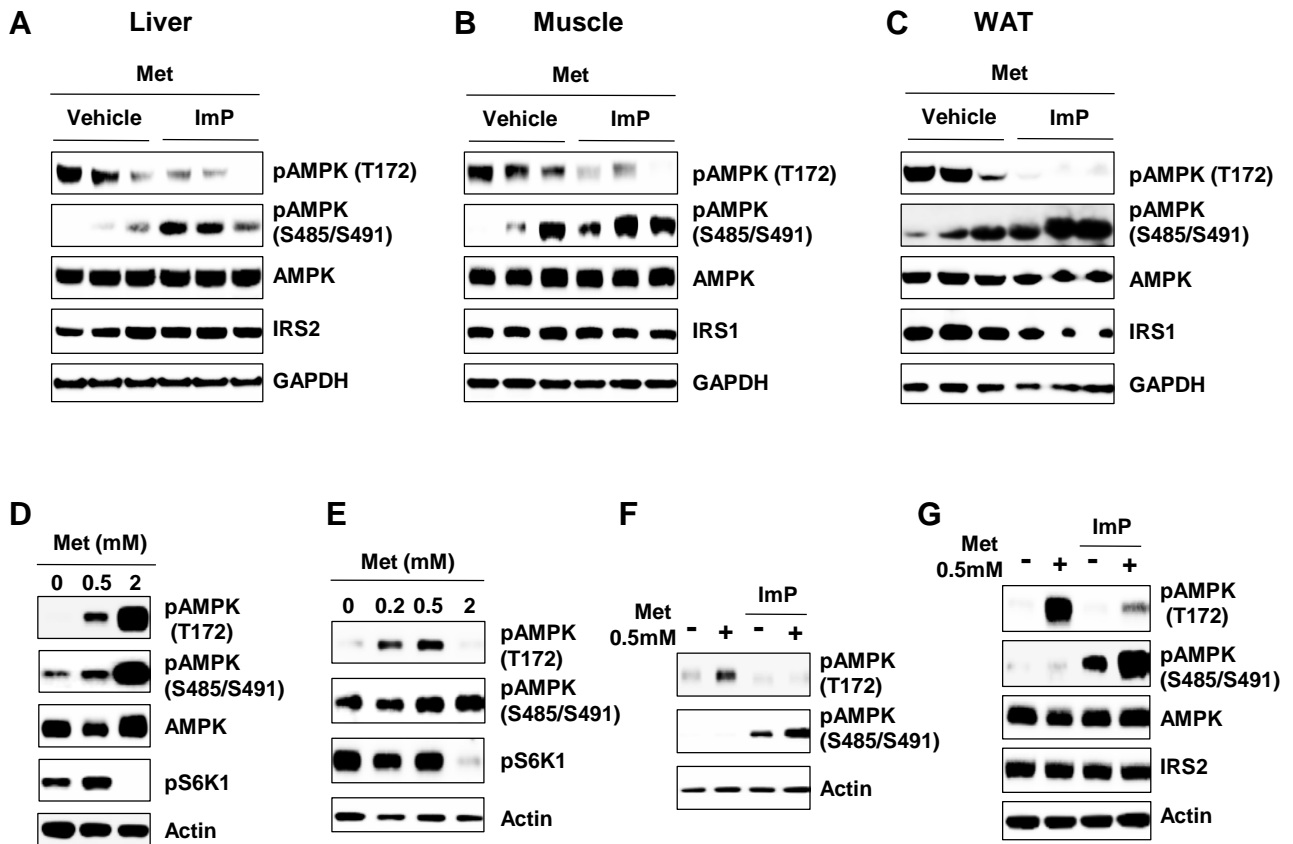

**Figure S2. Inverse relationship between AMPK active site T172 and inhibitory S485 phosphorylation, Related to Figure 2**

(A-C) Immunoblot of liver (A), soleus muscle (B), and WAT (C) lysates from mice showing effect of one intraperitoneal injection of imidazole propionate (ImP) on metformin (Met). Mice were injected intraperitoneally with vehicle (1% DMSO in water) or ImP (100  $\mu$ g) and after 1 h metformin (200 mg/kg) was orally administered; tissues were collected 45 min after metformin administration (representative of n = 3).

(D) Concentration-dependent effects of Met on AMPK in primary hepatocytes. Serum-starved primary hepatocytes were incubated with the indicated concentrations of Met for 8 h (representative of n = 2).

(E) Concentration-dependent effects of Met on AMPK in HEK293 cells. Serum-starved HEK293 cells were incubated with the indicated concentrations of Met for 6 h (representative of n = 2).

(F) Inhibitory effect of ImP on Met-induced AMPK T172 phosphorylation. HEK293 cells were co-treated with ImP (100  $\mu$ M) and Met for 6 h (representative of n = 3).

(G) Inhibitory effect of ImP on Met-induced AMPK T172 phosphorylation. Primary hepatocytes were co-treated with ImP (100  $\mu$ M) and Met for 8 h (representative of n = 3).

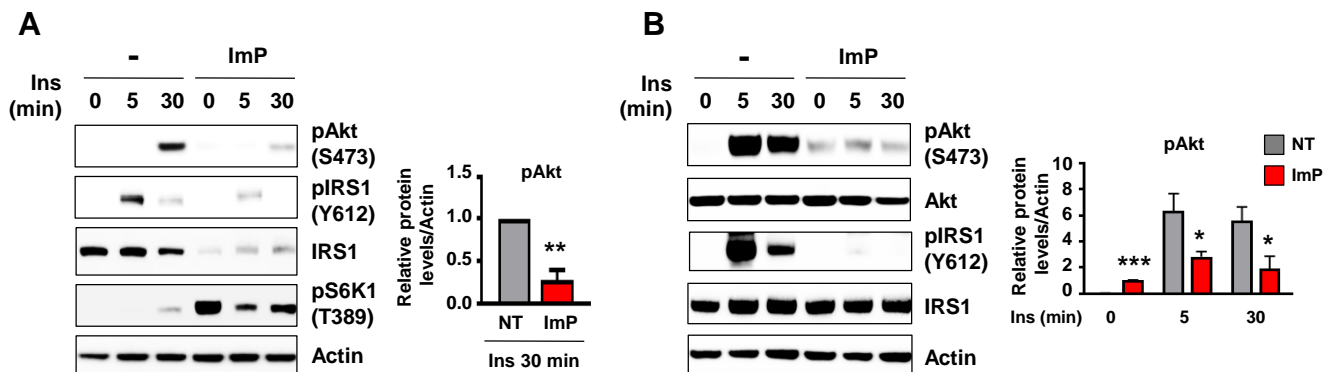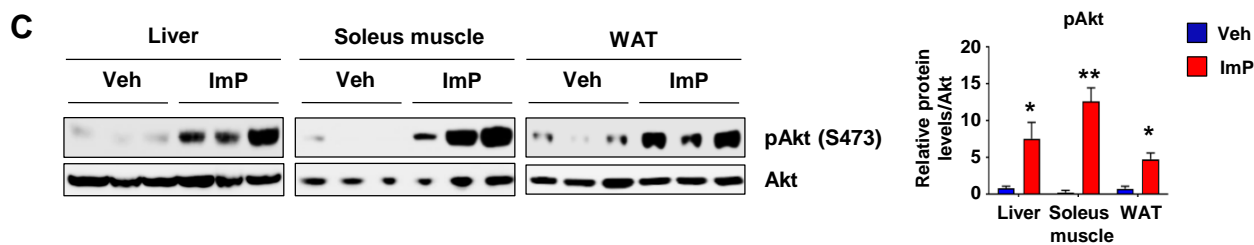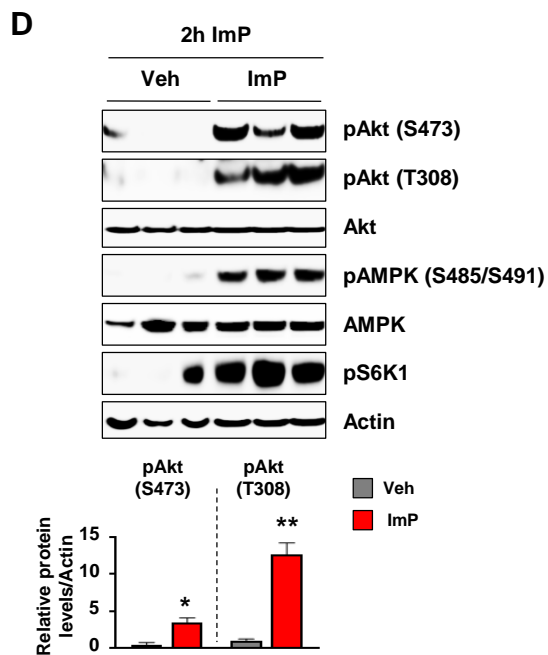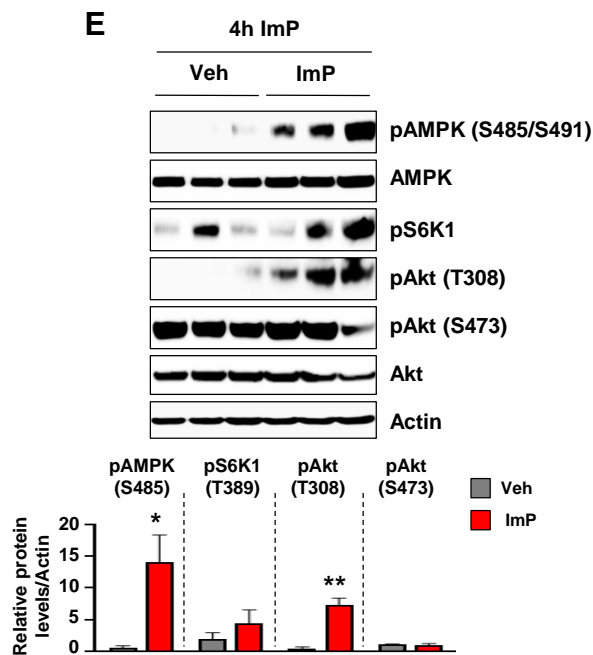

**Figure S3. Effects of imidazole propionate on basal Akt and inhibitory AMPK phosphorylation, Related to Figure 3**

(A) Effect of imidazole propionate (ImP) or control (NT) on insulin-stimulated Akt phosphorylation when IRS reduction occurs. Serum-starved HEK293 cells were pretreated with 100  $\mu$ M ImP for 8 h and then stimulated with 5 nM insulin (n = 3).

(B) Effect of 8 h ImP (100  $\mu$ M) on Akt activation [basal and insulin (5 nM)-stimulated] before IRS reduction occurs in primary hepatocytes (n = 5).

(C) Immunoblot of liver, soleus muscle, and WAT lysates from mice showing effect of 3-day treatment with vehicle (Veh) or 100  $\mu$ g ImP (twice per day) on basal Akt activation (n = 3).

(D) Immunoblot of liver 2 h after one intraperitoneal injection of ImP (100  $\mu$ g) in mice (n = 3).

(E) Immunoblot of liver 4 h after one intraperitoneal injection of ImP (100  $\mu$ g) in mice (n = 3).

Data are mean  $\pm$  s.e.m. \* $P$  < 0.05, \*\* $P$  < 0.01, \*\*\* $P$  < 0.001. Unpaired two-tailed Student's  $t$ -tests (A-E).

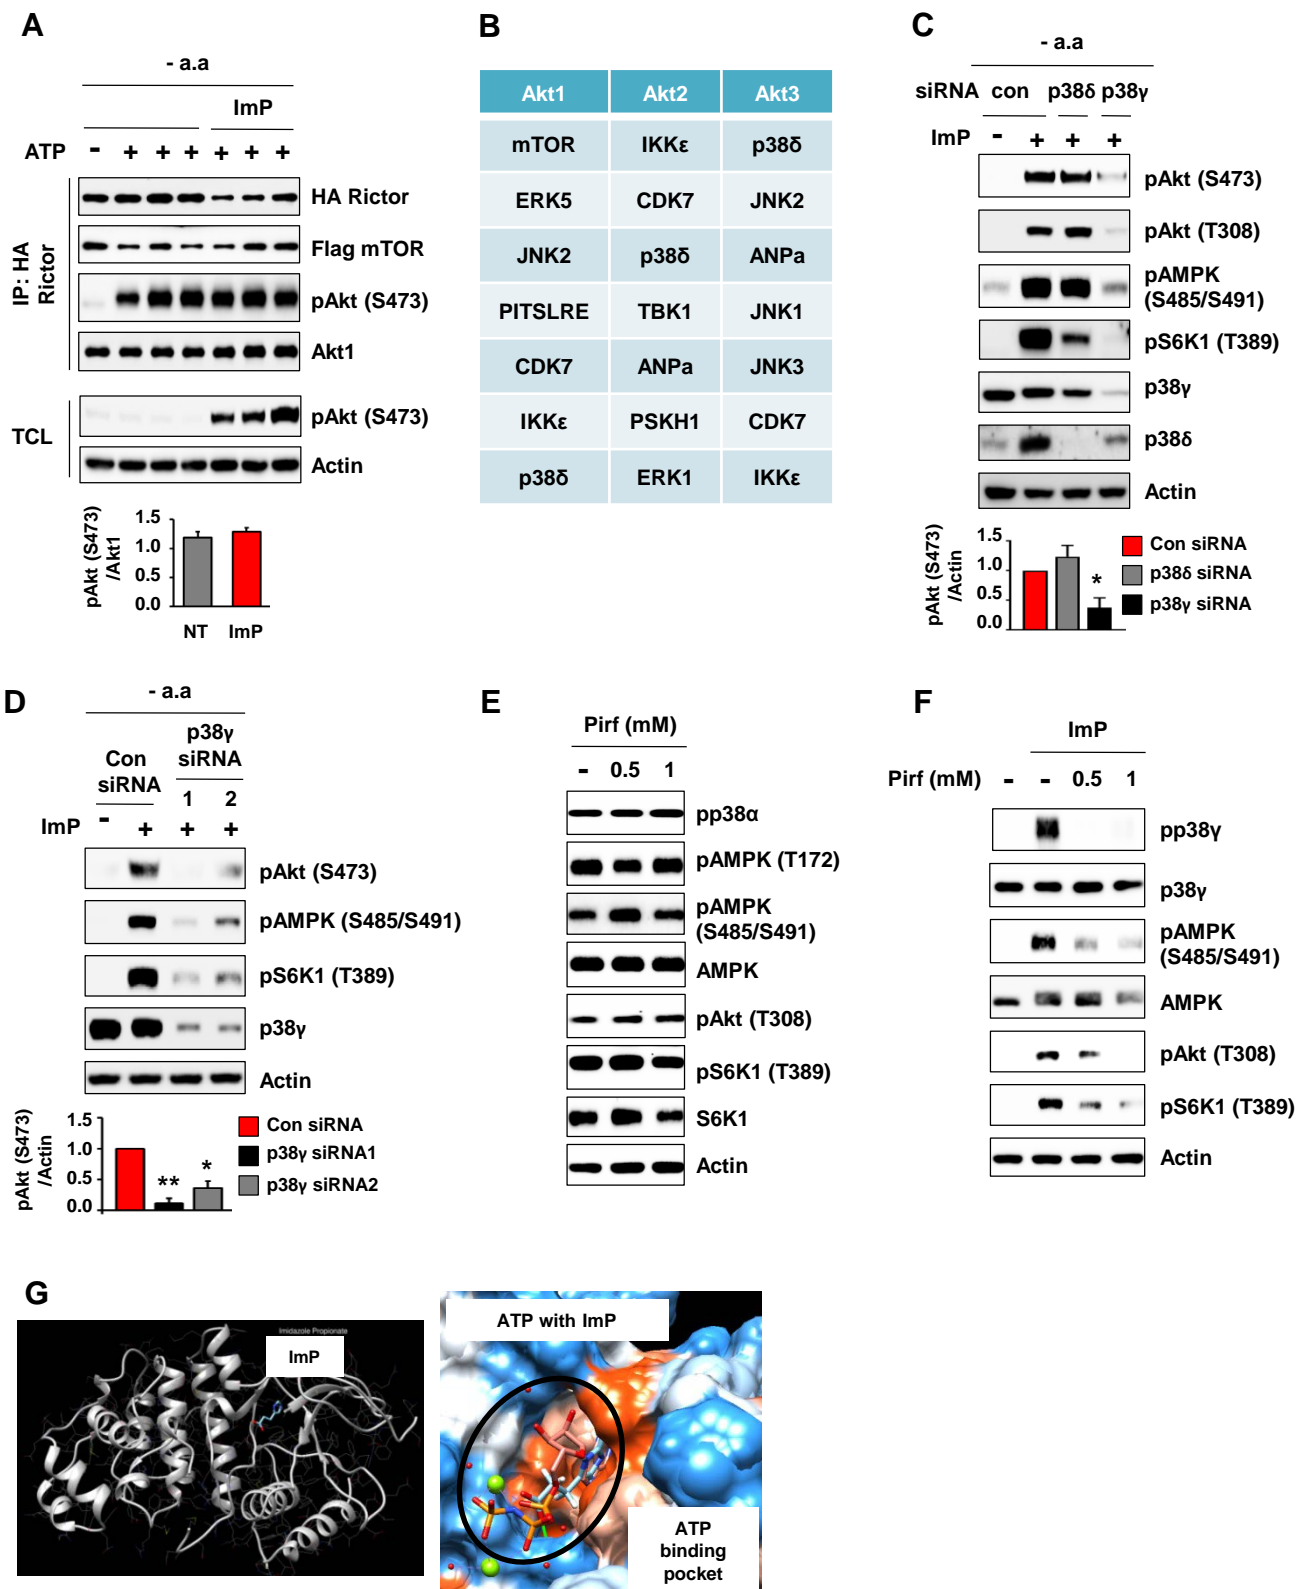

**Figure S4. Role of p38 $\gamma$  on imidazole propionate-induced Akt/AMPK phosphorylation, Related to Figure 4**

**(A)** Effects of imidazole propionate (ImP) on *in vitro* mTORC2 activity. HEK293 cells transfected with Flag mTOR and HA Rictor were serum- and amino acid-deprived and stimulated with ImP (100  $\mu$ M) for 2 h; immunoprecipitated mTORC2 (via HA Rictor) was used as a kinase and inactive Akt1 was used as a substrate in an *in vitro* kinase assay (n = 6).

**(B)** Potential upstream kinase prediction towards S473 of Akt1, 2, and 3 according to Kinase Predictor V2 score-proximity from the PhosphoNET database.

**(C)** Effect of alternative p38 knockdown on ImP-induced Akt activation (n = 3). HEK293 cells were transfected with control siRNA (con siRNA), p38 $\delta$  siRNA, or p38 $\gamma$  siRNA1 and incubated with 100  $\mu$ M ImP in the absence of amino acids for 1.5 h.

**(D)** Effects of two distinct non-overlapping siRNAs against p38 $\gamma$  on ImP-induced Akt activation (n = 3). HEK293 cells were transfected with control siRNA (Con siRNA) or p38 $\gamma$  siRNA and incubated with 100  $\mu$ M ImP in the absence of amino acids for 1.5 h.

**(E)** Effects of pirfenidone (Pirf) on AMPK in the absence of ImP. HEK293 cells were incubated with the indicated concentrations of Pirf for 6 h (representative of n = 2).

**(F)** Effects of the p38 $\gamma$  inhibitor pirfenidone (Pirf) on ImP-induced p38 $\gamma$  activation. Serum-starved HEK293 cells were co-incubated with 100  $\mu$ M ImP and Pirf for 6 h (representative of n = 2).

**(G) Left**, docking simulation of ImP (Zinc\_24690773) to p38 $\gamma$ . **Right**, superimposition of p38 $\gamma$ -ATP on simulated p38 $\gamma$ -ImP. Molecular docking calculations were performed using SwissDock and binding modes were scored and ranked using FullFitness. Results were visualized by UCSF Chimera package.

Data are mean  $\pm$  s.e.m. \* $P$  < 0.05, \*\* $P$  < 0.01. Unpaired two-tailed Student's *t*-tests (**A, C, D**).

|                                              | <b>Metformin<br/>successful<br/>(fasting glucose<br/>&lt;7.8 mM)</b> | <b>Metformin<br/>unsuccessful<br/>(fasting glucose<br/>≥7.8 mM)</b> | <i>P</i> value |
|----------------------------------------------|----------------------------------------------------------------------|---------------------------------------------------------------------|----------------|
| <b>n</b>                                     | 29                                                                   | 40                                                                  | -              |
| <b>Men, n (%)</b>                            | 22 (75.9)                                                            | 35 (87.5)                                                           | 0.349          |
| <b>Age, years</b>                            | 67.8 ± 1.2                                                           | 69.8 ± 0.9                                                          | 0.251          |
| <b>Body mass index,<br/>kg/m<sup>2</sup></b> | 29.2 ± 0.6                                                           | 30.8 ± 0.6                                                          | 0.083          |
| <b>Fasting plasma<br/>glucose, mM</b>        | 6.7 ± 0.2                                                            | 9.9 ± 0.4                                                           | <0.001 (***)   |
| <b>Mean time from<br/>diagnosis, years</b>   | 6.5 ± 1.6                                                            | 7.4 ± 1.0                                                           | 0.230          |

**Table S1. Clinical characteristics of subjects with type 2 diabetes who were treated with metformin, Related to Figure 1**

Data are presented as mean ± s.e.m or as proportions. *P* values were calculated using Wilcoxon Rank-Sum Test for continuous variables and chi square test for categorical variables.
